# Supplementary material for: Randomized Controlled Trial of Subcutaneous Epoetin Alfa-epbx Versus Epoetin Alfa in End-Stage Kidney Disease
Source: PubMed Central journal article supplement — Kidney Int Rep. 2019 May 22;4(9):1235–47. doi: 10.1016/j.ekir.2019.05.010 (PMC6734106; doi:10.1016/j.ekir.2019.05.010), 2019-05-22
Supplement: mmc1.pdf [file mmc1.pdf]

**Table S1.** Common concomitant medications<sup>a</sup>

| ATC 2 term, n (%)                                            | Epoetin alfa-epbx<br>n=122 | Epoetin alfa<br>n=122 |
|--------------------------------------------------------------|----------------------------|-----------------------|
| Anti-hypertensive agents <sup>b</sup>                        | 114 (93.4)                 | 107 (87.7)            |
| Calcium homeostasis                                          | 96 (78.7)                  | 98 (80.3)             |
| Vitamins                                                     | 86 (70.5)                  | 86 (70.5)             |
| Anti-anemic preparations                                     | 85 (69.7)                  | 71 (58.2)             |
| Drugs for treatment of hyperkalemia and<br>hyperphosphatemia | 83 (68.0)                  | 74 (60.7)             |
| Anti-thrombotic agents                                       | 82 (67.2)                  | 92 (75.4)             |
| Analgesics                                                   | 80 (65.6)                  | 74 (60.7)             |
| Lipid-modifying agents                                       | 64 (52.5)                  | 70 (57.4)             |
| Mineral supplements                                          | 58 (47.5)                  | 60 (49.2)             |
| Drugs used for diabetes                                      | 55 (45.1)                  | 59 (48.4)             |
| Drugs for acid-related disorders                             | 55 (45.1)                  | 55 (45.1)             |
| Antibacterials for systemic use                              | 38 (31.1)                  | 27 (22.1)             |
| Psycholeptics                                                | 38 (31.1)                  | 34 (27.9)             |
| Blood substitutes and perfusion solutions                    | 32 (26.2)                  | 41 (33.6)             |

<sup>a</sup> Analyses for concomitant medications are reported for the safety population for the maintenance phase.

<sup>b</sup> Concomitant medications with known therapeutic utility as anti-hypertensive agents were grouped with World Health Organization Drug Dictionary Enhanced (Version 2012 Mar 01 DDE) using ATC classification levels 2 and 4 grouping of selected medications to ensure capture

of anti-hypertensive classes including, but not limited to: diuretics; beta blockers; alpha-beta blockers; calcium channel blockers; agents acting on renin-angiotensin-aldosterone system, including angiotensin-converting enzyme inhibitors and angiotensin receptor blockers; vasodilators; centrally acting sympatholytic agents; and other selected agents with anti-hypertensive action.

ATC, Anatomical Therapeutic Chemical.

**Table S2.** Treatment-emergent adverse events occurring in  $\geq 5\%$  of patients in either treatment group during the titration phase

| Preferred term                          | Epoetin alfa-epbx<br>n=80 | Epoetin alfa<br>n=86 |
|-----------------------------------------|---------------------------|----------------------|
| Any treatment-emergent AE, n (%)        | 45 (56.3)                 | 54 (62.8)            |
| Headache                                | 4 (5.0)                   | 4 (4.7)              |
| Arteriovenous fistula site complication | 4 (5.0)                   | 3 (3.5)              |
| Procedural hypotension                  | 5 (6.3)                   | 2 (2.3)              |
| Hyperkalemia                            | 5 (6.3)                   | 1 (1.2)              |
| Muscle spasms                           | 0                         | 5 (5.8)              |
| Dizziness                               | 4 (5.0)                   | 0                    |
| Eosinophil count increased              | 4 (5.0)                   | 0                    |

---

AE, adverse event.

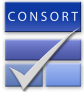

# CONSORT 2010 checklist of information to include when reporting a randomised trial\*

| Section/Topic                    | Item No | Checklist item                                                                                                                                                                              | Reported on page No  |
|----------------------------------|---------|---------------------------------------------------------------------------------------------------------------------------------------------------------------------------------------------|----------------------|
| <b>Title and abstract</b>        |         |                                                                                                                                                                                             |                      |
|                                  | 1a      | Identification as a randomised trial in the title                                                                                                                                           | p. 1                 |
|                                  | 1b      | Structured summary of trial design, methods, results, and conclusions (for specific guidance see CONSORT for abstracts)                                                                     | p. 2                 |
| <b>Introduction</b>              |         |                                                                                                                                                                                             |                      |
| Background and objectives        | 2a      | Scientific background and explanation of rationale                                                                                                                                          | p. 4-5               |
|                                  | 2b      | Specific objectives or hypotheses                                                                                                                                                           | p. 5                 |
| <b>Methods</b>                   |         |                                                                                                                                                                                             |                      |
| Trial design                     | 3a      | Description of trial design (such as parallel, factorial) including allocation ratio                                                                                                        | p. 6-7, and Figure 1 |
|                                  | 3b      | Important changes to methods after trial commencement (such as eligibility criteria), with reasons                                                                                          |                      |
| Participants                     | 4a      | Eligibility criteria for participants                                                                                                                                                       | p. 5-6               |
|                                  | 4b      | Settings and locations where the data were collected                                                                                                                                        | p. 6                 |
| Interventions                    | 5       | The interventions for each group with sufficient details to allow replication, including how and when they were actually administered                                                       | p. 6-8, and Figure 1 |
| Outcomes                         | 6a      | Completely defined pre-specified primary and secondary outcome measures, including how and when they were assessed                                                                          | p. 8-10              |
|                                  | 6b      | Any changes to trial outcomes after the trial commenced, with reasons                                                                                                                       |                      |
| Sample size                      | 7a      | How sample size was determined                                                                                                                                                              | p. 9                 |
|                                  | 7b      | When applicable, explanation of any interim analyses and stopping guidelines                                                                                                                | N/A                  |
| <b>Randomisation:</b>            |         |                                                                                                                                                                                             |                      |
| Sequence generation              | 8a      | Method used to generate the random allocation sequence                                                                                                                                      | p. 7                 |
|                                  | 8b      | Type of randomisation; details of any restriction (such as blocking and block size)                                                                                                         |                      |
| Allocation concealment mechanism | 9       | Mechanism used to implement the random allocation sequence (such as sequentially numbered containers), describing any steps taken to conceal the sequence until interventions were assigned | p. 7-8               |
| Implementation                   | 10      | Who generated the random allocation sequence, who enrolled participants, and who assigned participants to interventions                                                                     | p. 7-8               |

|                                                      |     |                                                                                                                                                   |                                        |
|------------------------------------------------------|-----|---------------------------------------------------------------------------------------------------------------------------------------------------|----------------------------------------|
| Blinding                                             | 11a | If done, who was blinded after assignment to interventions (for example, participants, care providers, those assessing outcomes) and how          | p. 6 (double-blind)                    |
|                                                      | 11b | If relevant, description of the similarity of interventions                                                                                       |                                        |
| Statistical methods                                  | 12a | Statistical methods used to compare groups for primary and secondary outcomes                                                                     | p. 9-10                                |
|                                                      | 12b | Methods for additional analyses, such as subgroup analyses and adjusted analyses                                                                  | p. 9 (sensitivity analysis)            |
| <b>Results</b>                                       |     |                                                                                                                                                   |                                        |
| Participant flow (a diagram is strongly recommended) | 13a | For each group, the numbers of participants who were randomly assigned, received intended treatment, and were analysed for the primary outcome    | p. 11, and Figure 2                    |
|                                                      | 13b | For each group, losses and exclusions after randomisation, together with reasons                                                                  | Figure 2                               |
| Recruitment                                          | 14a | Dates defining the periods of recruitment and follow-up                                                                                           | p. 7                                   |
|                                                      | 14b | Why the trial ended or was stopped                                                                                                                | N/A                                    |
| Baseline data                                        | 15  | A table showing baseline demographic and clinical characteristics for each group                                                                  | Table 1                                |
| Numbers analysed                                     | 16  | For each group, number of participants (denominator) included in each analysis and whether the analysis was by original assigned groups           | p. 11 and Tables 1-4                   |
| Outcomes and estimation                              | 17a | For each primary and secondary outcome, results for each group, and the estimated effect size and its precision (such as 95% confidence interval) | p. 12, Table 2, and Figure 3           |
|                                                      | 17b | For binary outcomes, presentation of both absolute and relative effect sizes is recommended                                                       | N/A                                    |
| Ancillary analyses                                   | 18  | Results of any other analyses performed, including subgroup analyses and adjusted analyses, distinguishing pre-specified from exploratory         | p. 12 (sensitivity analysis)           |
| Harms                                                | 19  | All important harms or unintended effects in each group (for specific guidance see CONSORT for harms)                                             | p. 13-15, Tables 3 and 4, and Figure 4 |
| <b>Discussion</b>                                    |     |                                                                                                                                                   |                                        |
| Limitations                                          | 20  | Trial limitations, addressing sources of potential bias, imprecision, and, if relevant, multiplicity of analyses                                  | p. 17                                  |
| Generalisability                                     | 21  | Generalisability (external validity, applicability) of the trial findings                                                                         | p. 15-18                               |
| Interpretation                                       | 22  | Interpretation consistent with results, balancing benefits and harms, and considering other relevant evidence                                     | p. 15-18                               |
| <b>Other information</b>                             |     |                                                                                                                                                   |                                        |
| Registration                                         | 23  | Registration number and name of trial registry                                                                                                    | p. 2 (abstract) and 6                  |
| Protocol                                             | 24  | Where the full trial protocol can be accessed, if available                                                                                       |                                        |

\*We strongly recommend reading this statement in conjunction with the CONSORT 2010 Explanation and Elaboration for important clarifications on all the items. If relevant, we also recommend reading CONSORT extensions for cluster randomised trials, non-inferiority and equivalence trials, non-pharmacological treatments, herbal interventions, and pragmatic trials. Additional extensions are forthcoming: for those and for up to date references relevant to this checklist, see [www.consort-statement.org](http://www.consort-statement.org).
